# Supplementary material for: Livestock management and compost addition shape soil microbial communities and enzymatic activities in Mediterranean agroecosystems
Source: Research Square preprint supplement (doi:10.21203/rs.3.rs-8364916/v1), 2025-12-23
Supplement: Supplementary file 1 [file 3cc680beced2fbea5fc5d402.docx]

**Supplementary**


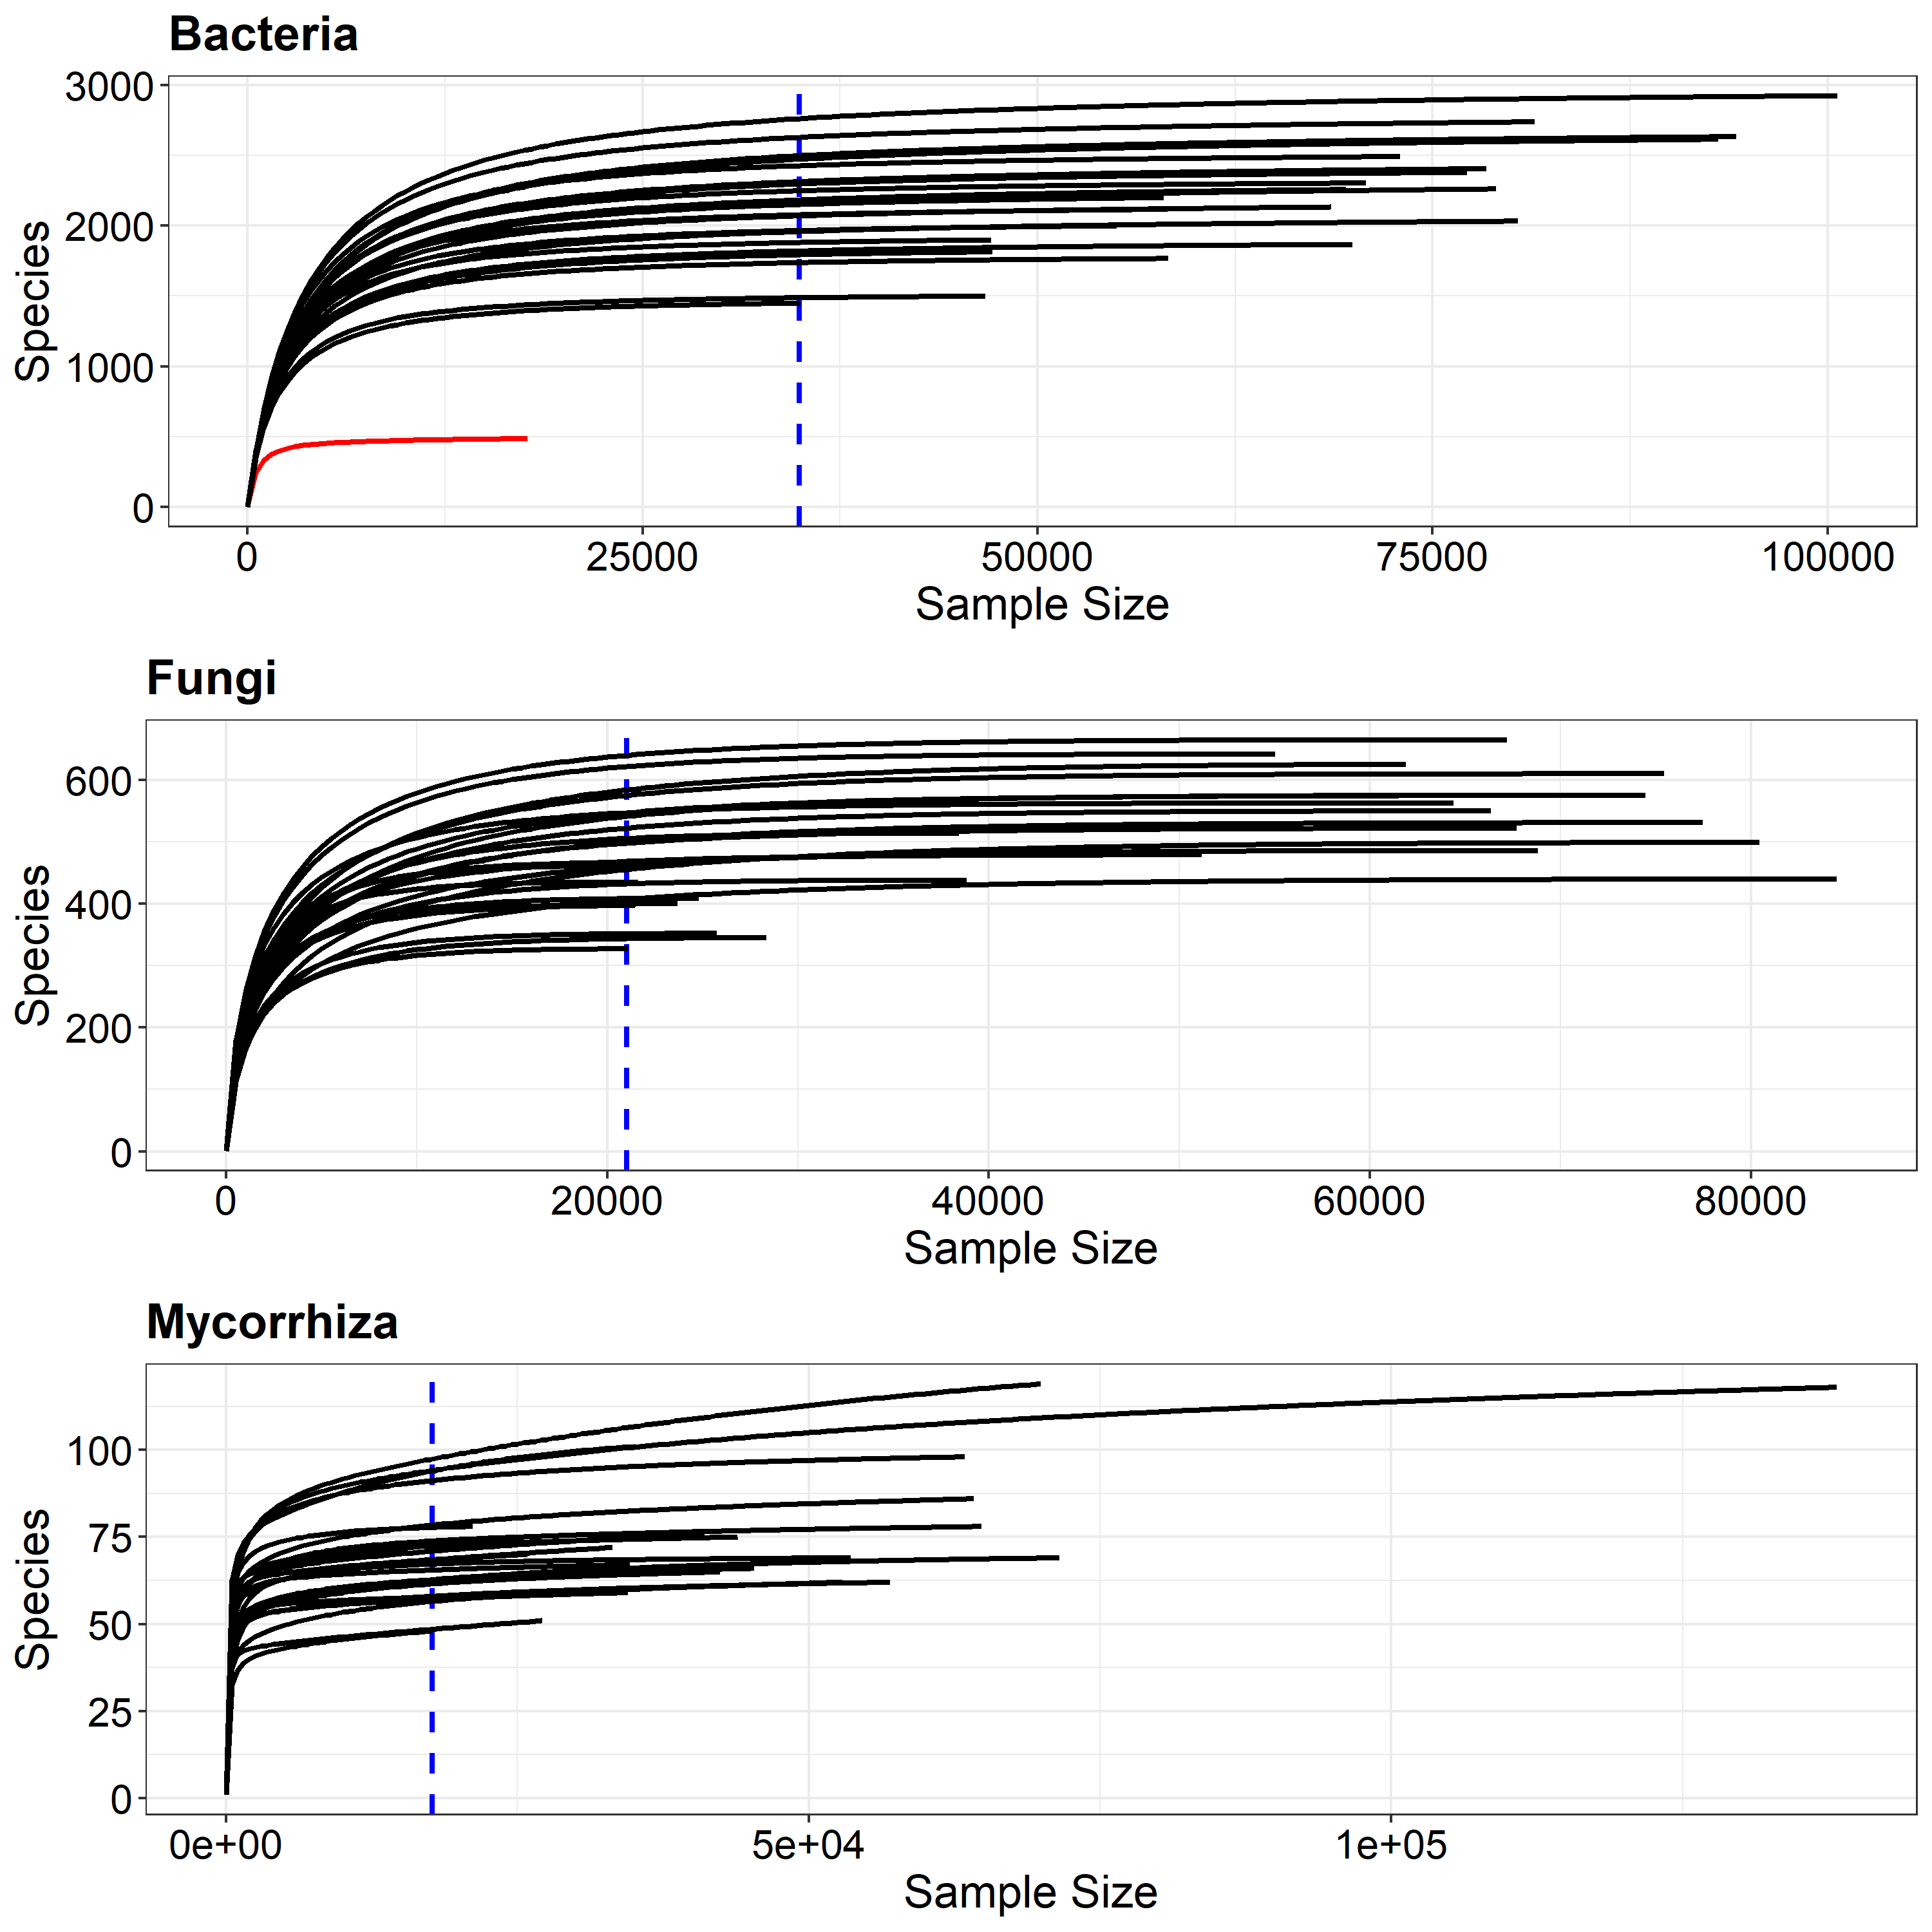


Supplementary Figure S1. Rarefaction curves showing the number of unique phylotypes as a function of normalized library size for all samples. Red curves represent samples with small library sizes and thus, excluded from downstream analysis.

**
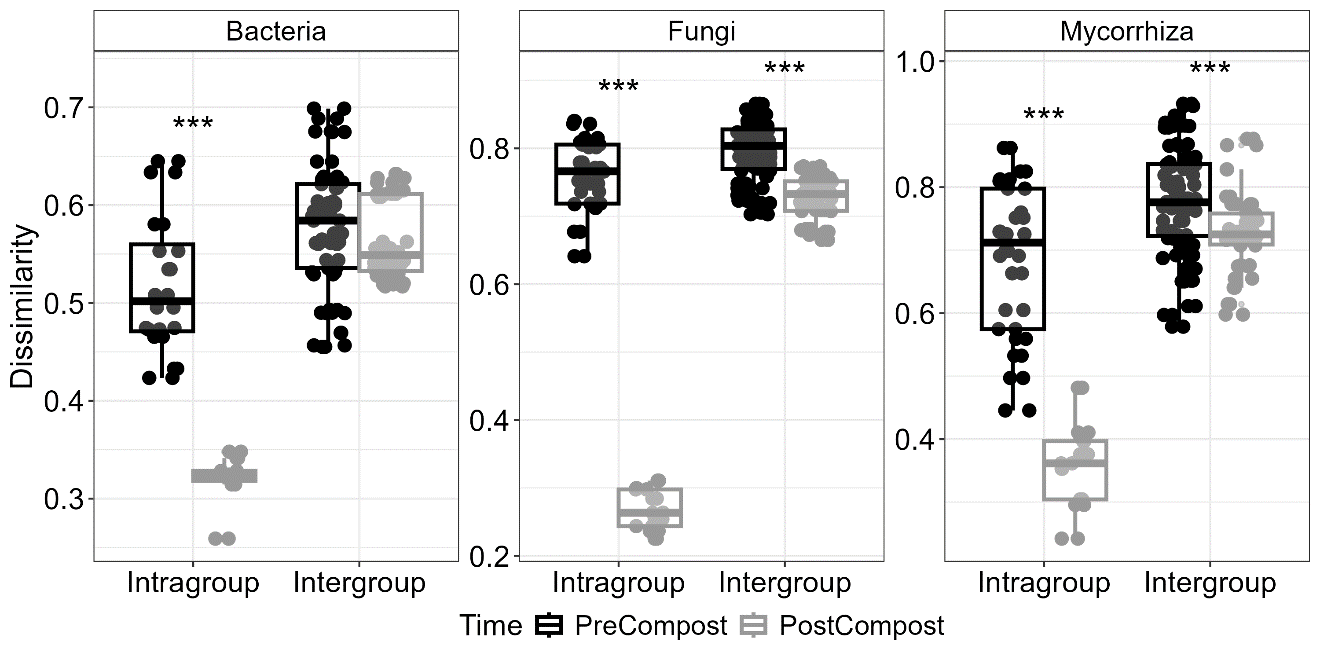
**

Supplementary Figure S2. Boxplots representing the Bray-Curtis community dissimilarity within each livestock group (Intragroup) and across livestock groups (Intergroups). Asterisks denote significant differences (Wilcoxon test, **p* < 0.05, ***p* < 0.01, ****p* < 0.001).

Supplementary Table S1. Anova results (F and *p*-value) showing the main significant factors (i.e., livestock management, compost addition, or interaction).

| Anova results | | Bacteria | | Fungi | | Mycorrhiza | |
| --- | --- | --- | --- | --- | --- | --- | --- |
|  |  | F | T | F | T | F | T |
|  |  | *p* | *p* | *p* |
| Livestock | Exclusion | 0.051 ns | a | 4.373 * | b | 10.128  ** | b |
| Equine | a | a | a |
| Ovine | a | ab | b |
| Compost |  | 1.288 ns | | 27.298 *** | | 0.354 ns | |
| Livestock : compost | | 0.221 ns | | 1.221 ns | | 0.394 ns | |
